# Supplementary material for: Effects of rice root exudates on aggregation, dissolution and bioaccumulation of differently-charged Ag nanoparticles
Source: Royal Society of Chemistry journal article supplement (doi:10.1039/d2ra00229a), 2022-01-01
Supplement: d2ra00229a1.pdf [file d2ra00229a1.pdf]

## Supplementary Information

### Effects of rice root exudates on aggregation, dissolution and bioaccumulation of differently-charged Ag nanoparticles

Jijia Yang<sup>1\*</sup>, Hongyu Duan<sup>1</sup>, Xiya Wang<sup>2</sup>, Huan Zhang<sup>1</sup>, Zhifeng Zhang<sup>1\*</sup>

<sup>1</sup> School of Life Science, Shanxi Normal University, Taiyuan, 030000, China

<sup>2</sup> School of Life Science, East China Normal University, Shanghai, 200241, China

---

\*Corresponding author. Fax: (86) 0351-2051196. E-mail: jjyang2009@126.com;  
zzfsx2012@126.com

**Fig.S1.**

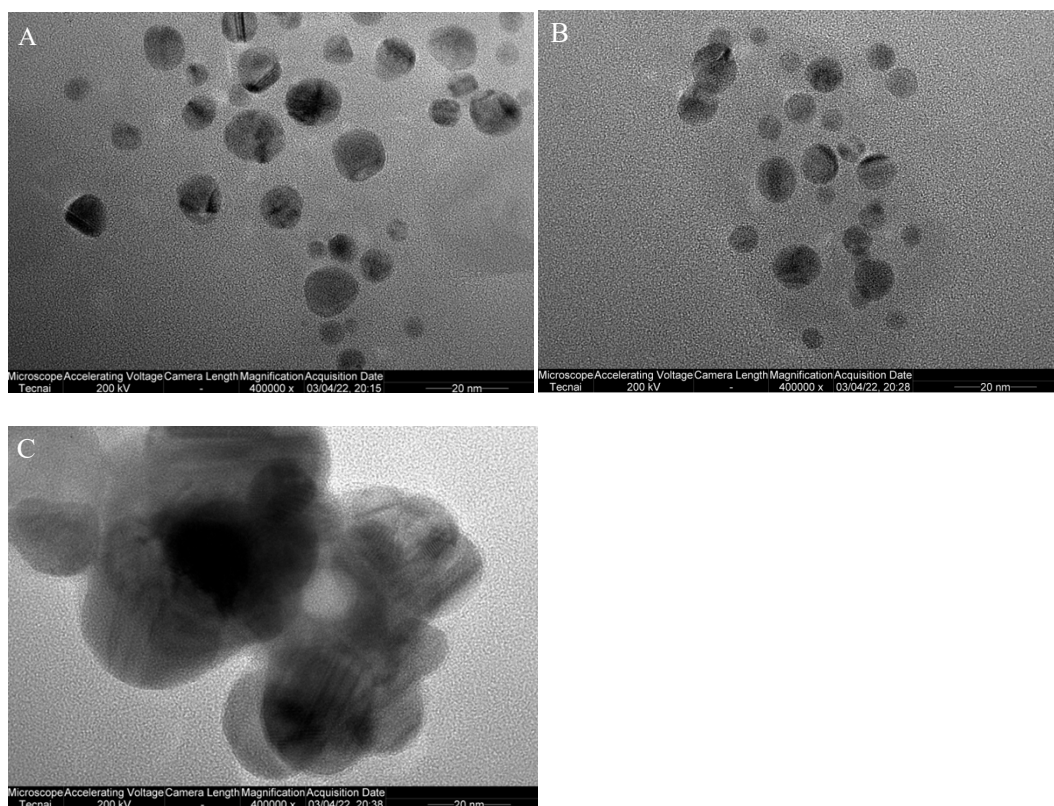

Fig.S1. Transmission electron micrographs of AgNPs@Cit (A), AgNPs@PVP(B), and AgNPs@PEI (C) after 20 min incubation with T-RRE ( $10\text{mg L}^{-1}$ ).

Fig.S2.

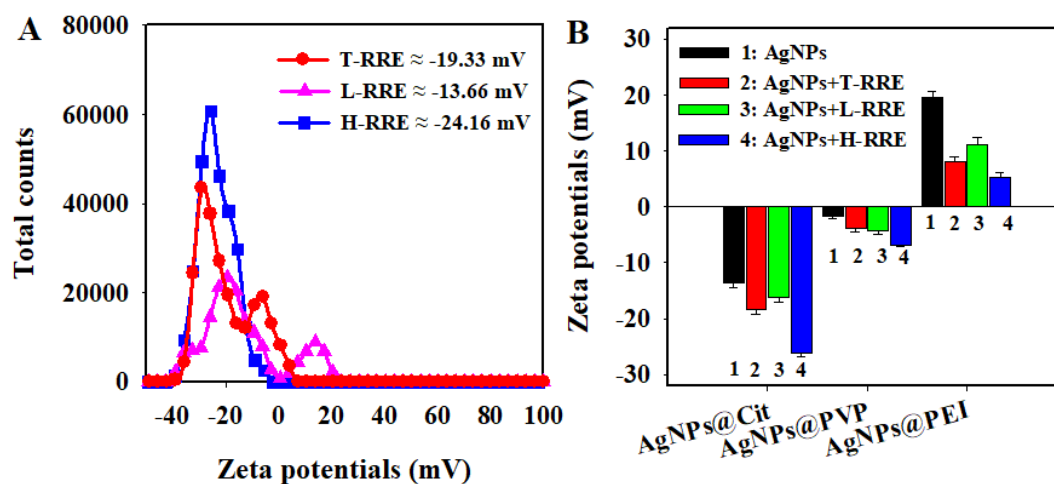

Fig.S2. (A) Zeta potential of T-RRE, L-RRE, and H-RRE. (B) Zeta potential change in AgNPs in the presence of T-RRE, L-RRE, and H-RRE. The concentration of T-RRE, L-RRE, and H-RRE are all 10 mg L<sup>-1</sup>. The concentration of each AgNP is 100 mg mL<sup>-1</sup>.

Fig. S3.

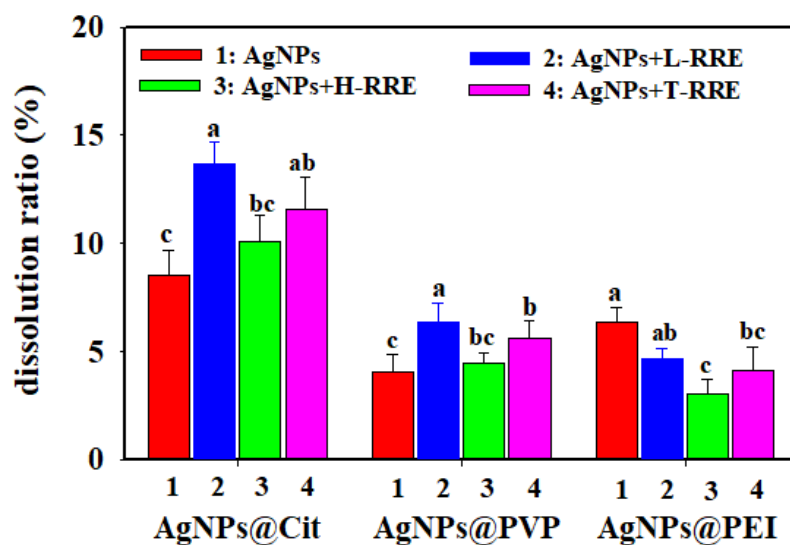

**Fig. S3.** Dissolution ratio of AgNPs@Cit, AgNPs@PVP, and AgNPs@PEI in the presence of T-RRE, L-RRE, and H-RRE after 168 h of incubation, respectively. Error bars indicate standard deviation of the mean (n =3). Samples with a different letter were significantly different ( $P < 0.05$ ), as determined using Duncan LSD test.

**Table.S1**

XPS data of AgNPs@Cit, AgNPs@PVP, and AgNPs@PEI in the absence and presence of T-RRE, H-RRE, and L-RRE within 168 h of incubation, respectively.

| AgNPs types | Fitted peak                       | AgNPs (CK)       |            | AgNPs +T-RRE     |            | AgNPs +H-RRE     |            | AgNPs +L-RRE     |            |
|-------------|-----------------------------------|------------------|------------|------------------|------------|------------------|------------|------------------|------------|
|             |                                   | Binding energies | Atomic (%) |
| AgNPs@Cit   | Ag <sup>+</sup> 3d <sub>5/2</sub> | 367.63           | 31.88      | 367.73           | 83.53      | 367.60           | 79.44      | 367.53           | 88.88      |
|             | Ag <sup>+</sup> 3d <sub>3/2</sub> | 373.63           |            | 373.74           |            | 373.63           |            | 373.57           |            |
|             | Ag <sup>0</sup> 3d <sub>5/2</sub> | 368.12           | 68.12      | 368.3            | 16.47      | 368.23           | 20.56      | 368.33           | 11.22      |
|             | Ag <sup>0</sup> 3d <sub>3/2</sub> | 374.13           |            | 374.41           |            | 374.32           |            | 374.36           |            |
| AgNPs@PVP   | Ag <sup>+</sup> 3d <sub>5/2</sub> | 367.69           | 16.4       | 367.52           | 30.79      | 367.52           | 33.51      | 367.51           | 31.63      |
|             | Ag <sup>+</sup> 3d <sub>3/2</sub> | 373.73           |            | 373.56           |            | 373.55           |            | 373.66           |            |
|             | Ag <sup>0</sup> 3d <sub>5/2</sub> | 368.29           | 83.6       | 368.12           | 69.21      | 368.11           | 66.49      | 368.24           | 68.37      |
|             | Ag <sup>0</sup> 3d <sub>3/2</sub> | 374.29           |            | 374.13           |            | 374.11           |            | 374.25           |            |
| AgNPs@PEI   | Ag <sup>+</sup> 3d <sub>5/2</sub> | 367.56           | 24.8       | 357.54           | 25.28      | 367.63           | 19.75      | 367.65           | 28.48      |
|             | Ag <sup>+</sup> 3d <sub>3/2</sub> | 373.6            |            | 373.58           |            | 373.59           |            | 373.69           |            |
|             | Ag <sup>0</sup> 3d <sub>5/2</sub> | 368.16           | 75.2       | 368.19           | 73.72      | 368.23           | 80.25      | 368.25           | 71.52      |
|             | Ag <sup>0</sup> 3d <sub>3/2</sub> | 374.15           |            | 374.15           |            | 371.10           |            | 374.19           |            |
